# Supplementary material for: Inhibition of Cardiac p38 Highlights the Role of the Phosphoproteome in Heart Failure Progression
Source: PubMed Central journal article supplement (PMC11601511; doi:10.1101/2024.11.20.624554), 2024-11-20
Supplement: media-1.pdf [file media-1.pdf]

1  
2  
3  
4  
5  
6  
7  
8  
9  
10  
11  
12  
13  
14  
15  
16  
17  
18  
19  
20  
21  
22  
23  
24  
25  
26  
27  
28  
29  
30

**Methods:**

*Animal model*

Hartley guinea pigs (~300 g; HillTop Lab Animals) were housed in the animal facility at the Johns Hopkins University. This study conforms to the Guide for the Care and Use of Laboratory Animals published by the National Institutes of Health (NIH Publication No. 85-23, revised 1996) and was approved by the Johns Hopkins Animal Care and Use Committee. Male animals were anesthetized with 4% isoflurane in a closed box for 4 min, and then intubated. Animals were ventilated with oxygen and 2% isoflurane. Ascending aortic constriction (AC) was produced by tying a suture around the ascending aorta using an 18-gauge needle as a spacer, which was then removed. Sham operation was performed following the same procedure without the ligation. Daily bolus of Isoproterenol (ISO) was administered via a programmable iPRECIO® pump (SMP-200, Data Science International, St. Paul MN) that was implanted in the peritoneal cavity. The pump was programmed for 1-hour daily delivery of Isoproterenol for a dose of 1 mg/kg/day. For the treatment of SB203580, an osmotic pump (Alzet Osmotic pump, model 2004, (Cupertino, CA) was implanted in the abdominal cavity. SB203580 was delivered continuously at 0.5 mg/kg/day DA. A vehicle filled osmotic pump was implanted for control in ACi group. The following treatment group were studied: 1. Sham-operated, serving as controls 2. ACi (Aortic constriction +Isoproterenol treatment till end point) 3. ACi-SB (Aortic constriction +Isoproterenol treatment+ SB203580 treatment) All personnel involved in data collection and analysis were blinded to the treatment and non-treatment groups. Both groups received similar incisions and thus, could not be distinguished based on these interventions. Each animal was assigned a unique computer-generated numeric ID.

31 *Echocardiography*

32

33 Transthoracic echocardiography was performed on conscious non-anesthetized guinea  
34 pigs by using a Vevo 2100 high-resolution in vivo imaging system with 24 MHz transducer  
35 (VisualSonics, Toronto, ON, Canada) and analyzed with the Advanced cardiovascular  
36 package software (VisualSonics).

37

38 *Data and statistical analysis*

39

40 For heart weight, lung weight and FS% analysis between groups, one-way analysis of  
41 variance (ANOVA) followed by Tukey's post hoc analysis was used.

42

43 *Proteomic Studies*

44 *Protein extraction and Immunoblotting*

45

46 Ventricles were harvested. Tissues were rinsed in cold PBS, rapidly heat-stabilized  
47 (Stabilizer™, Denator, Inc.), snap-frozen in liquid nitrogen, and stored in a -80 freezer. To  
48 extract protein, stabilized tissues were homogenized with RIPA buffer in the presence of  
49 2% SDS, solubilized, and boiled in 1x LDS sample buffer for SDS-PAGE. The protein  
50 mixture was separated on a 4-12% NuPAGE gel (1 mm, Invitrogen). Samples were run  
51 at room temperature for 35 min at 200 V. Proteins were transferred to nitrocellulose  
52 membranes with iBlot (Invitrogen, Inc.), using program 3 for 7 min. Membranes were  
53 stained with Ponceau S solution (Sigma-Aldrich) to evaluate the transfer efficiency.  
54 Membranes were blocked for 1 h using Odyssey® blocking buffer (Li-Cor Biosciences)  
55 and incubated with primary antibody overnight at 4°C. Antibody binding was visualized  
56 with an infrared imaging system using IRDye secondary antibodies and quantification of  
57 band intensity was performed using the Odyssey Application Software 3.0.

58

| Antibodies | Brand | Cat # | Species | Type | Dilution |
|------------|-------|-------|---------|------|----------|
|------------|-------|-------|---------|------|----------|

|                                                        |                           |           |        |           |          |
|--------------------------------------------------------|---------------------------|-----------|--------|-----------|----------|
| p38 MAPK Antibody                                      | Cell Signaling Technology | 9212      | Rabbit | primary   | 1:1,000  |
| Phospho-p38 MAPK (Thr180/Tyr182) (D3F9) XP® Rabbit mAb | Cell Signaling Technology | 4511      | Rabbit | primary   | 1:1,000  |
| IRDye® 800CW Goat anti-Rabbit IgG Secondary Antibody   | Li-Cor                    | 926-32211 | Goat   | secondary | 1:10,000 |

59  
60 Densitometric analysis of p38 and phosphorylated p38 (p-p38) signals in three distinct  
61 groups was conducted using Image J software, with data derived from digitized .tif image  
62 files. These signals were subsequently normalized to total protein levels detected via  
63 Ponceau staining. Statistical analysis was performed using one-way analysis of variance  
64 (ANOVA), followed by Tukey's post hoc test, to evaluate the comparison of p-p38/p38  
65 ratios across the different groups.

66  
67 *Sample Preparation, Proteolysis and TMT labeling*

68  
69 The experiment compared 3 experimental groups: 1) Sham-operated controls, 2) ACi  
70 failing hearts (at 4 weeks) and 3) ACi animals treated concomitantly with SB203580 (0.5  
71 mg/kg/day).

72  
73 *Sample Preparation, Proteolysis and TMT labeling*

74  
75 Hearts were harvested and washed with ice cold phosphate-buffered saline. The left  
76 ventricle free wall was isolated and immediately subjected to heat denaturation to abolish  
77 all enzyme activity using the Denator Stabilizor System (Denator) according to the  
78 manufacturer's instructions. Denatured samples were then stored at -80° C until the next  
79 step. The left ventricle of each guinea pig heart was homogenized with a handheld  
80 Polytron tissue disrupter in filtered and deionized, Tris-buffered 9M urea (5mL), pH 7.5  
81 Samples were allowed to solubilize for 30 min at room temperature. Soluble homogenates

82 were subjected to methanol/chloroform/water extraction and protein precipitation by the  
83 method of Wessel & Flugge(1). Samples were dried under nitrogen gas to remove  
84 residual chloroform before resolubilizing for 30 min in 9M urea. Aggregates were  
85 disrupted by brief bursts of sonication (< 30s total). Peptides were diluted 6-fold into 60  
86 mM HEPES, 0.6 mM DTT, pH 7.5 such that the final reaction buffer contained 50 mM  
87 HEPES, 1.5 M urea, 0.5 mM DTT, pH 7.5. All samples were diluted further with reaction  
88 buffer to a common final protein concentration of 1mg/mL. Samples (1mg) were subjected  
89 to proteolytic digestion with proteomics grade Trypsin (1µg/100µg protein; Promega) at  
90 room temperature, overnight. The following morning, samples were supplemented with  
91 Trypsin (1µg/100µg protein; Promega). At that time, DTT was added to samples at a  
92 concentration of 5 mM and the digest was allowed to proceed for 1 hour prior to peptide  
93 alkylation by addition of iodoacetamide to a final concentration of 15 mM. Alkylation was  
94 allowed to proceed 1 hour at room temperature in the dark. Peptides were subsequently  
95 acidified by addition of trifluoroacetic acid to a final concentration 0.5% (v/v) and purified  
96 by solid phase extraction using SepPak tC18 cartridges (Waters) on a vacuum manifold.  
97 Purified peptides were eluted with 60% (v/v) acetonitrile in aqueous 0.1% (v/v) formic  
98 acid. Peptides were evaporated to dryness on an Eppendorf Vacufuge. Peptide samples  
99 were resolubilized in triethylammonium bicarbonate (TEAB) pH 8.5 and labeled with TMT  
100 reagents according to the manufacturer's instructions.

101

### 102 *Chromatography & Mass Spectrometry*

103 Following TMT labeling of individual samples, peptides were pooled and subjected to  
104 high-pH reversed-phase liquid chromatography (bRP-HPLC) (2), as detailed by Foster et  
105 al. (3). Briefly, samples were fractionated at 250ul/min on a Waters BEH C18 column with  
106 a gradient running from 10mM TEAB to 90% Acetonitrile, 10mM TEAB over 105 minutes.  
107 The fractions were concatenated into 24 fractions of which 20% of each was taken for the  
108 expression proteome determination. The remaining 80% was combined into 11 fractions  
109 and TiO<sub>2</sub> enrichment was performed to assess the phosphoproteome.

110

111 Following concatenation, samples were analyzed using a nanoAquity nanoLC system  
112 (Waters) interfaced with an Orbitrap Fusion Lumos Tribrid Mass Spectrometer

113 (ThermoFisher Scientific). Peptides were injected onto a 2-cm trap column at 5  $\mu\text{L}/\text{minute}$   
114 for 6 minutes before being eluted onto a 75  $\mu\text{m}\times 15\text{ cm}$  in-house packed column (Michrom  
115 Magic C18AQ, 5  $\mu\text{m}$ , 100 $\text{\AA}$ ) operating at 300 nL/min. Each sample was run on a 90-  
116 minute gradient. Data were acquired using a 3 second cycle between MS1 scans in FT-  
117 FT acquisition mode. The survey full-scan MS (400-1600 Th) was performed at a  
118 resolution 120,000 with an automatic gain control target ion intensity of  $4\times 10^5$ , while MS<sup>2</sup>  
119 scans were performed at a resolution of 50,000 with a target value of  $1.25\times 10^5$ . Mass  
120 tolerances for were +/- 10ppm for MS1. Maximum injection times were set to "Auto" for  
121 MS1 and 86 ms for MS<sup>2</sup>. A 0.7 Dalton isolation window was used and HCD fragmentation  
122 was performed with a normalized collision energy of 36. Internal calibration was set to  
123 Easy-IC. Spectra whose charge was unassigned or +1 were not tabulated. Dynamic  
124 exclusion was set to a repeat count of 1 with a 15s exclusion time.

125

#### 126 *Protein Identification*

127

128 The .Raw files for both the enriched and unenriched (12 + 24 respectively) were searched  
129 against a guinea pig database of predicted protein sequences (NCBI RefSeq, taxonomy:  
130 *Cavia porcellus*, date:01/20/2021, FASTA format, 37727 sequences), using Mascot  
131 Version: 2.8.0 (Matrix Science) interfaced through Proteome Discoverer 2.4.0.305  
132 (Thermo). Peaks were filtered at a signal to noise ratio of 3, deisotoped, and searched  
133 with a parent ion mass tolerance of 5 ppm and an MS2 mass tolerance of 0.02 Da.  
134 Precursors that had co-isolation of 30% or greater were discarded from quantification.  
135 Trypsin was specified as the enzyme and 1 missed cleavage was allowed. N-terminal  
136 labeling with TMTpro reagent and carbamidomethyl were specified as a fixed  
137 modifications and dynamic modifications included deamidated NQ, oxidized M,  
138 phosphorylation on STY, and TMTpro on lysine. All searches were conducted with the  
139 reversed database search mode engaged. Percolator software was used for peptide FDR  
140 (q-value) calculations. Mascot output files (.dat) tabulated were in Proteome Discoverer.  
141 Only high confidence peptides only (q<0.01) were used for protein identification and  
142 quantification.

143

144 *Spectral Inclusion Criteria for Quantitation*

145

146 Analysis was confined to uniquely- and unambiguously assigned spectra (1% peptide  
147 FDR). Missingness of ion intensities for a single spectrum across reporter channels, was  
148 low (< 2% of unique spectra with intensities missing from one or more channels),  
149 indicative of efficient TMT labeling and fragmentation.

150

151 *Protein Quantification by TMT and Statistical Analysis*

152

153 Reporter ion intensities were integrated over 20 ppm using the most confident centroid  
154 method and corrected for purity in Proteome Discoverer 2.5 (Thermo). Spectral TMT  
155 signals were quantified using the median sweep algorithm originally described by  
156 Herbrich et al.(4) essentially as implemented recently by Foster et al.(3) with a minor  
157 modification. TMT reporter ion intensities were 1) logarithmically-transformed (base 2), 2)  
158 median-centered within each channel prior to 3) median-centering each individual  
159 spectrum across channels, 4) determining protein abundance by taking the median value  
160 of the logarithmically-transformed median-centered intensities for all spectra belonging to  
161 that protein in a given channel (median summarization) For phosphopeptide analysis, all  
162 spectra (phosphorylated and unphosphorylated) median-centered, as above, and median  
163 summarized at the peptide level. Unphosphorylated peptides were filtered from the final  
164 table.

165

166 Following the median sweep, differential protein abundance between experimental  
167 groups was assessed using a Bayesian statistical framework, specifically, linear modeling  
168 of microarrays(5) (LIMMA) with multi-group comparison. Pairwise contrasts were also  
169 performed. The resulting moderated p-values were used to assess the positive false  
170 discovery rate (q-value) method of Storey (6, 7). The code used for the median sweep  
171 procedure and statistical analysis can be found at [https://github.com/Frostman300/p38-](https://github.com/Frostman300/p38-upload)  
172 [upload](https://github.com/Frostman300/p38-upload). P-values derived from pairwise-comparisons to were utilized to determine specific  
173 differences between the groups, as demonstrated in the boxplots presented in the figures.

174

175 *Finding Homologous Human Peptides*

176

177 An Excel macro was written to find human peptides homologous to the detected guinea  
178 pig peptides using the command line version of Protein-Protein BLAST (2.15.0+). In brief,  
179 for each guinea pig peptide detected, blastp was used to compare the full length  
180 sequence of the corresponding guinea pig protein with a fasta format database of all  
181 Homo Sapiens refseq proteins downloaded from the NCBI protein database. Blastp was  
182 then used to align the guinea pig peptide with the corresponding highest scoring human  
183 protein target. The best homologous peptide match was then output to the spreadsheet.  
184 Macro code is available at <https://github.com/Frostman300/p38-upload>.

185

186 *Ingenuity Pathways Core Analysis Search Parameters*

187

188 For IPA core analysis of the proteome, uploaded data fields included the gene name and  
189  $\log_2(AC_i/AC_{iSB})$  value. Data were compared to the Ingenuity Knowledge Base reference  
190 set, which included genes only. The search space was limited to consideration of  
191 database relationships derived from primary tissues; data arising from cancer cell lines  
192 was excluded from analysis. Both direct(transcriptional ) and indirect(signaling)  
193 relationships were probed. Highlighted pathways were among those with Benjamin-  
194 Hochberg-corrected p-values of  $<0.05$ . Pathways are colored according to their z-score.  
195 The z-score integrates, not only gene over-representation, but the degree of concordance  
196 between supplied data (direction of change, magnitude, and p-value) and a database of  
197 curated relationships compiled from scientific literature and publicly-available datasets.  
198 IPA provides an inference about whether upstream gene-regulatory and signaling  
199 pathways may be activated or inhibited. Higher scores, whether positive or negative,  
200 reflect the strength of the inference(8).

201

202 *Network Analysis*

203 Functional protein association/interaction networks were constructed by loading the gene  
204 identifiers of up and downregulated proteins into stringApp 2.0.3 (9) embedded in

205 Cytoscape 3.10.2 (10). The default association/interaction threshold (STRING score >  
206 0.4) was used to map relationships between proteins. Network modularity was assessed  
207 with the Markov clustering function in the clusterMaker2 app (v.2.3.4) (11) using the  
208 STRING score (>0.6) for edge weighting. The granularity parameter (inflation value) was  
209 set empirically. Modules were rearranged for clarity and named consistent with STRING's  
210 multipathway enrichment terms (e.g. Gene Ontology, Reactome, Kegg, among others).  
211 Singletons that were ontologically consistent with a module were grouped with it. The  
212 phosphorylation association network was further annotated using Omics Visualizer 1.3.1.  
213 (12) embedded in Cytoscape.

214

215

216



217 **References:**

- 218 1. D. Wessel, U. Flügge, A method for the quantitative recovery of protein in dilute  
219 solution in the presence of detergents and lipids. *Analytical biochemistry* **138**,  
220 141-143 (1984).
- 221 2. Y. Wang *et al.*, Reversed-phase chromatography with multiple fraction  
222 concatenation strategy for proteome profiling of human MCF10A cells.  
223 *Proteomics* **11**, 2019-2026 (2011).
- 224 3. D. B. Foster *et al.*, Integrated omic analysis of a guinea pig model of heart failure  
225 and sudden cardiac death. *Journal of proteome research* **15**, 3009-3028 (2016).
- 226 4. S. M. Herbrich *et al.*, Statistical inference from multiple iTRAQ experiments  
227 without using common reference standards. *Journal of proteome research* **12**,  
228 594-604 (2013).
- 229 5. G. K. Smyth, Linear models and empirical bayes methods for assessing  
230 differential expression in microarray experiments. *Statistical applications in*  
231 *genetics and molecular biology* **3** (2004).
- 232 6. J. D. Storey, A direct approach to false discovery rates. *Journal of the Royal*  
233 *Statistical Society Series B: Statistical Methodology* **64**, 479-498 (2002).
- 234 7. J. D. Storey, R. Tibshirani, Statistical significance for genomewide studies.  
235 *Proceedings of the National Academy of Sciences* **100**, 9440-9445 (2003).
- 236 8. A. Krämer, J. Green, J. Pollard Jr, S. Tugendreich, Causal analysis approaches  
237 in ingenuity pathway analysis. *Bioinformatics* **30**, 523-530 (2014).
- 238 9. N. T. Doncheva *et al.*, Cytoscape stringApp 2.0: Analysis and Visualization of  
239 Heterogeneous Biological Networks. *Journal of Proteome Research* **22**, 637-646  
240 (2023).
- 241 10. P. Shannon *et al.*, Cytoscape: a software environment for integrated models of  
242 biomolecular interaction networks. *Genome Res* **13**, 2498-2504 (2003).
- 243 11. J. H. Morris *et al.*, clusterMaker: a multi-algorithm clustering plugin for  
244 Cytoscape. *BMC bioinformatics* **12**, 436 (2011).
- 245 12. M. Legeay, N. T. Doncheva, J. H. Morris, L. J. Jensen, Visualize omics data on  
246 networks with Omics Visualizer, a Cytoscape App. *F1000Res* **9**, 157 (2020).

247
