# Supplementary material for: Inhibition of Cardiac p38 Highlights the Role of the Phosphoproteome in Heart Failure Progression
Source: PubMed Central journal article supplement (PMC11601511; doi:10.1101/2024.11.20.624554), 2024-11-20
Supplement: NIHPP2024.11.20.624554v1-supplement-3.pdf [file NIHPP2024.11.20.624554v1-supplement-3.pdf]

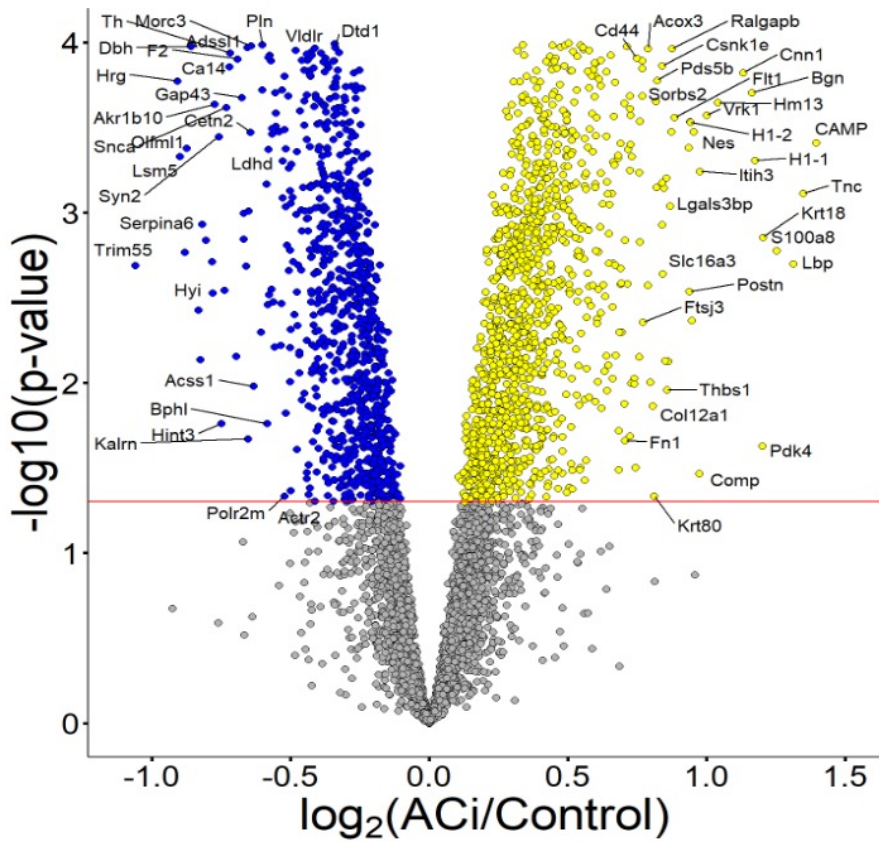

**Figure. S1. Volcano plot highlighting specific examples of proteins changing between ACi and Control:** yellow nodes demonstrate proteins that were significantly upregulated in ACi vs Control ; Blue nodes demonstrate proteins that were significantly downregulated in ACi vs control

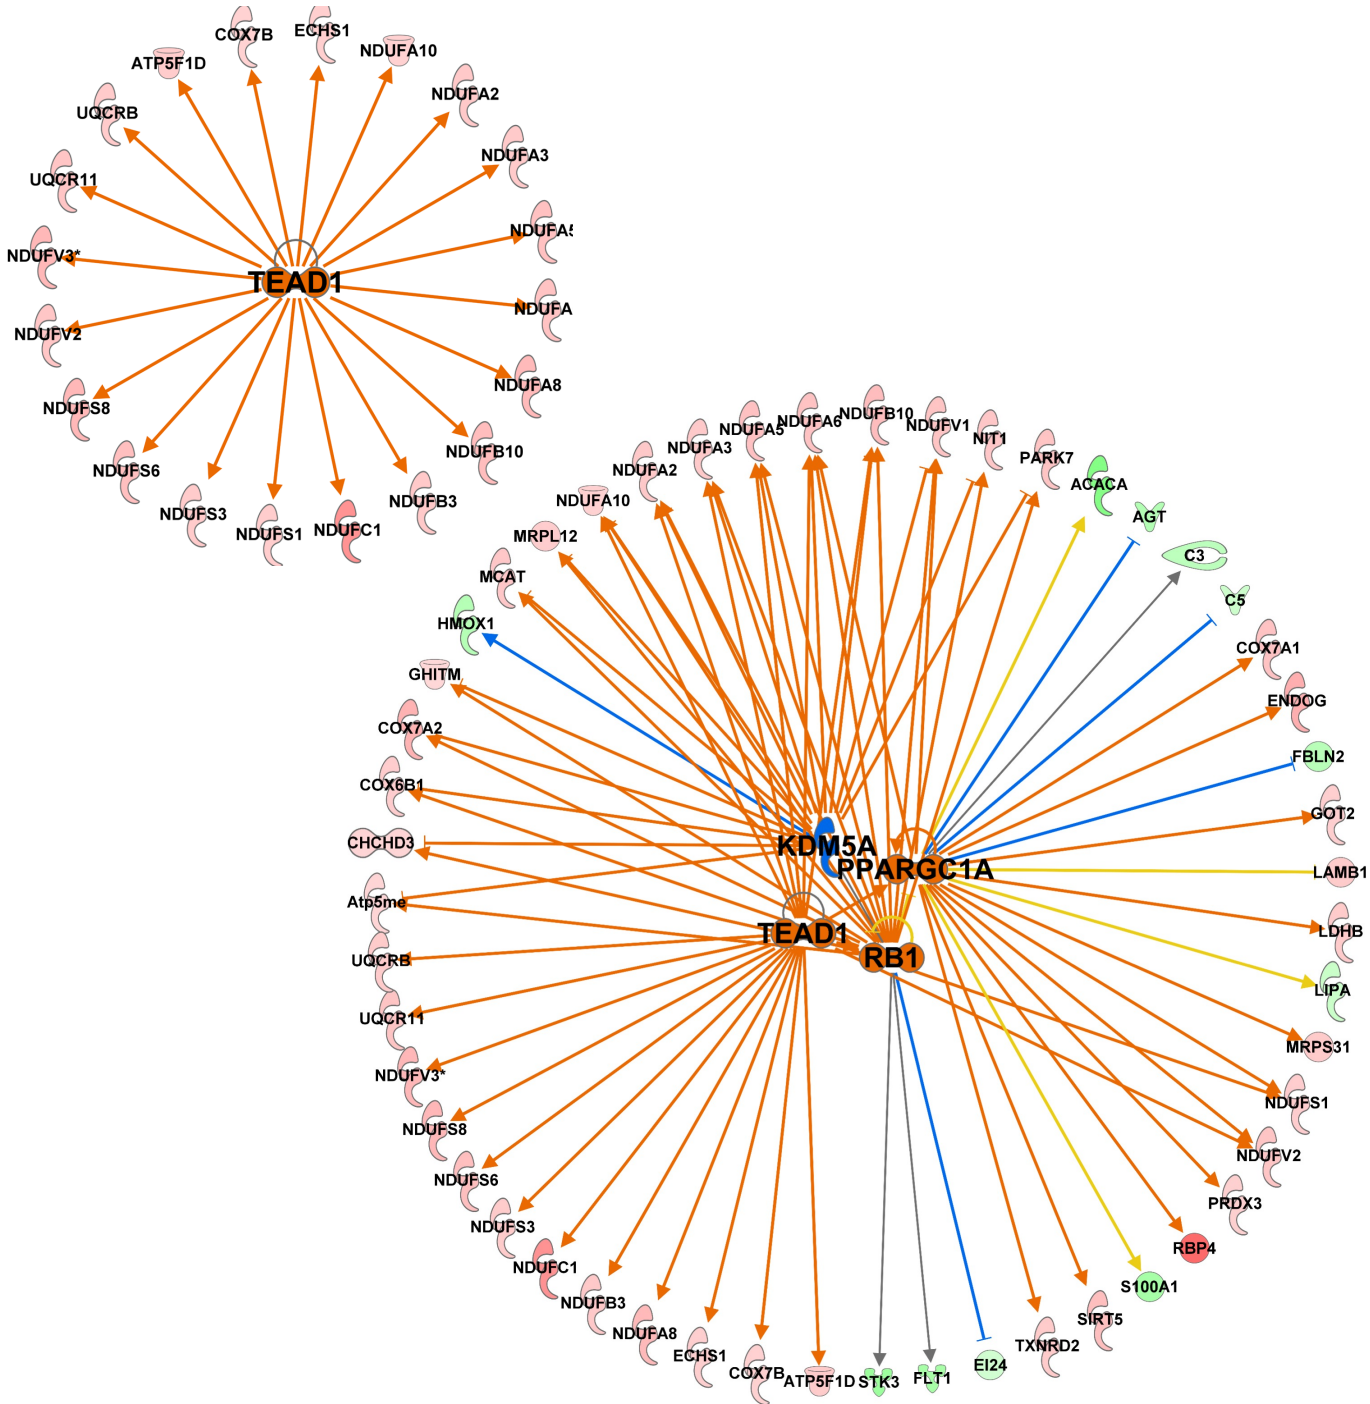

**Figure. S2.** A network diagram of transcriptional regulators, including TEAD1, KDM5A, PPARGC1A, and RB1 previously shown in Figure 2.G.

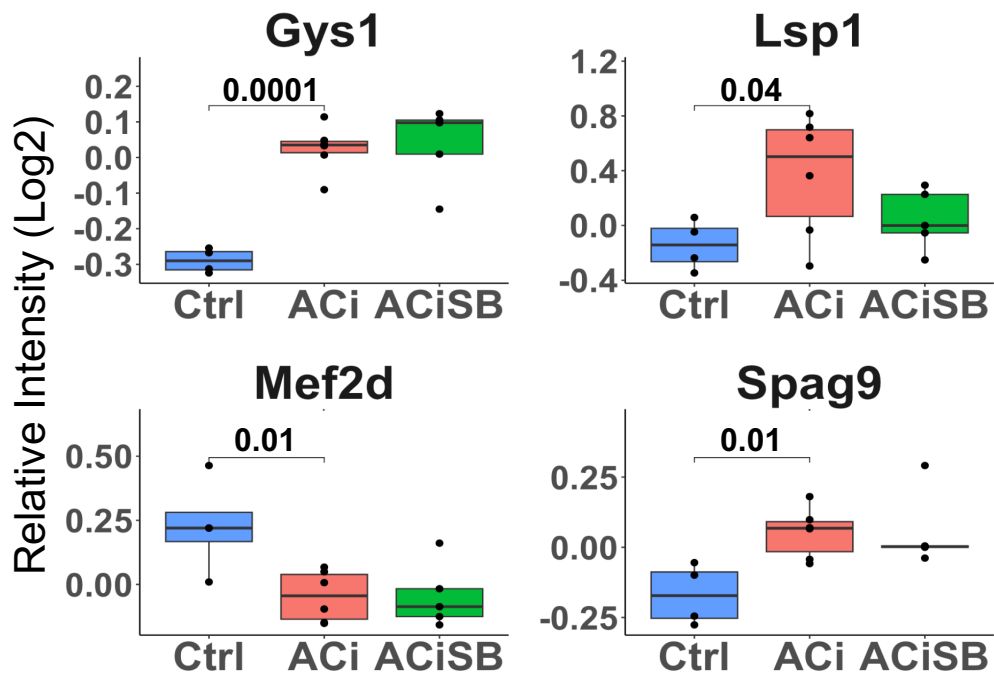

**Figure S3. Expression of many p38 MAPK substrates does not change in ACi:** Global significance ( $p < 0.05$ ) established via F-test, with p-values derived from LIMMA contrast matrices for inter-group comparisons. P-values  $< 0.05$  are indicated by faceted brackets.

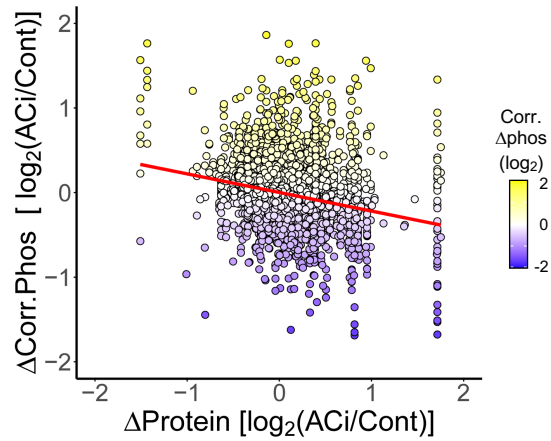

**Figure S4.** Correcting phosphorylation signals for underlying protein abundance substantially reduces the dependence of phosphorylation on protein dynamics in HF.

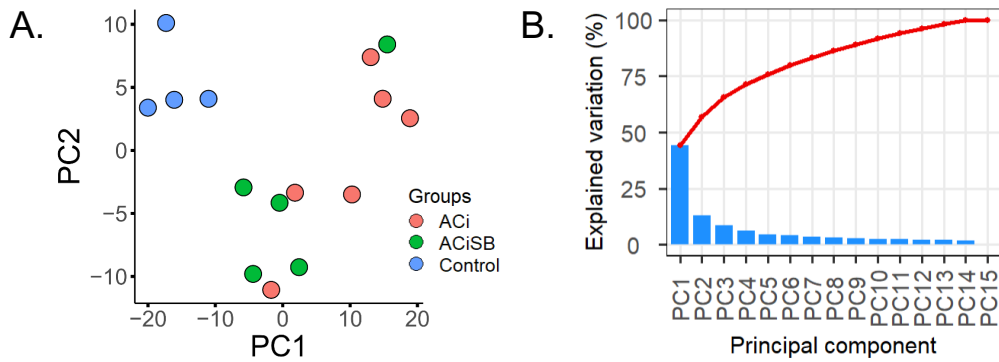

**Figure S5.** Phosphoproteome, uncorrected for protein abundance. A. PCA biplot indicates of the ACi phosphoproteome from control. SB mitigates remodeling, though changes in protein abundance accounts for a large measure of the variance. B. Scree plot indicating the contribution of each principal component to experimental variance.

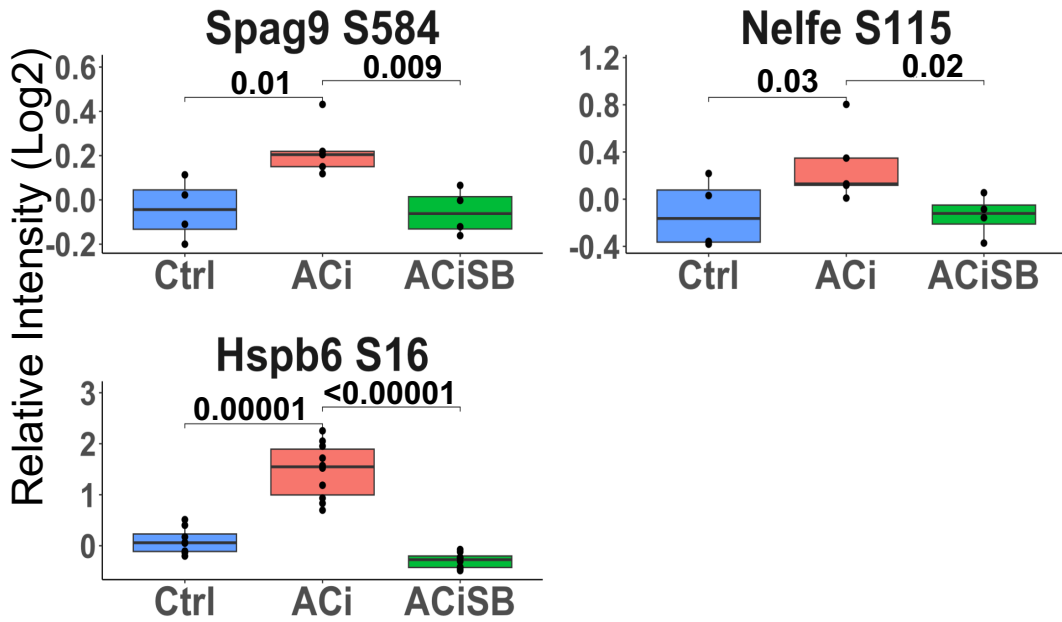

**Figure S6. Phosphorylation of known p38 MAPK substrates and targets :** Global significance ( $p < 0.05$ ) established via F-test, with p-values derived from LIMMA contrast matrices for inter-group comparisons. P-values  $< 0.05$  are indicated by faceted brackets.

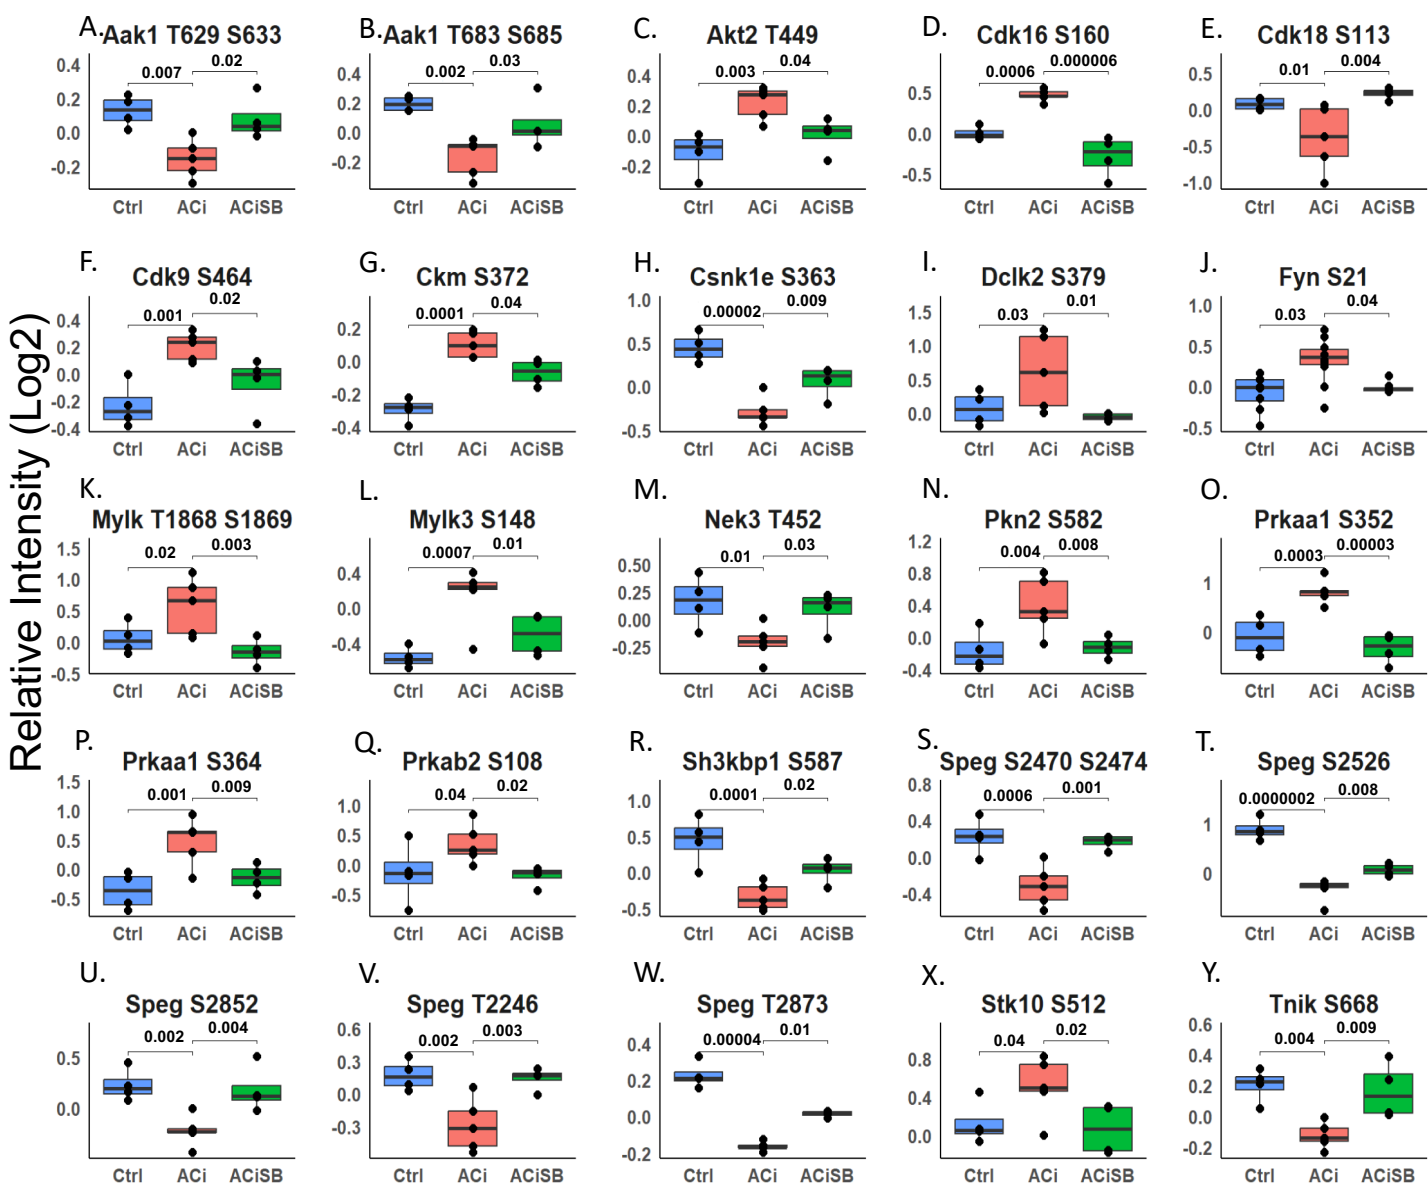

**Figure S7. ACISB-Responsive Kinase Phosphorylation** Global significance ( $p < 0.05$ ) established via F-test, with p-values derived from LIMMA contrast matrices for inter-group comparisons. Only a subset of results is shown in the figure. P-values  $< 0.05$  are indicated by faceted brackets.
